# Supplementary material for: Flexible Electrochemical Platform Coupled with In Situ Prepared Synthetic Receptors for Sensitive Detection of Bisphenol A
Source: MDPI journal article supplement (doi:10.3390/bios12121076), 2022-11-25
Supplement: s1 [file s1]

Supporting Information

# Flexible Electrochemical Platform Coupled with In Situ Prepared Synthetic Receptors for Sensitive Detection of Bisphenol A

Chen-Yan Xu, Kang-Ping Ning, Zheng Wang, Yao Yao, Qin Xu \* and Xiao-Ya Hu

School of Chemistry and Chemical Engineering, Yangzhou University, Yangzhou 225002, China

\* Correspondence: xuqin@yzu.edu.cn

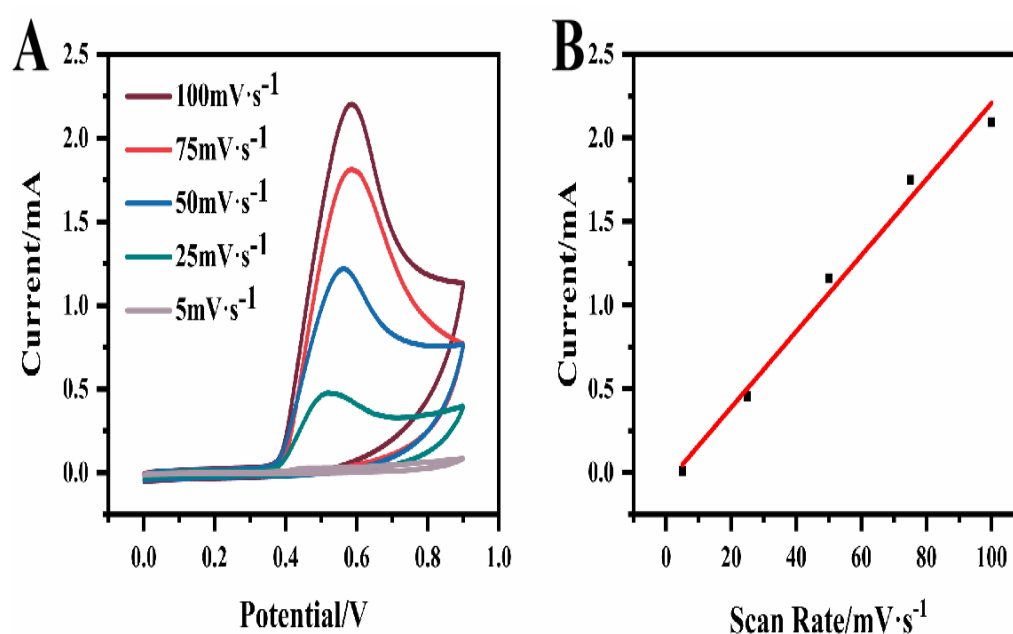

**Figure S1.** (A) CVs of  $1.0\ \mu\text{mol}\cdot\text{L}^{-1}$  BPA at MIP@CF electrode at different scan rates; (B) The oxidation peak currents of  $1.0\ \mu\text{mol}\cdot\text{L}^{-1}$  BPA against scan rates.

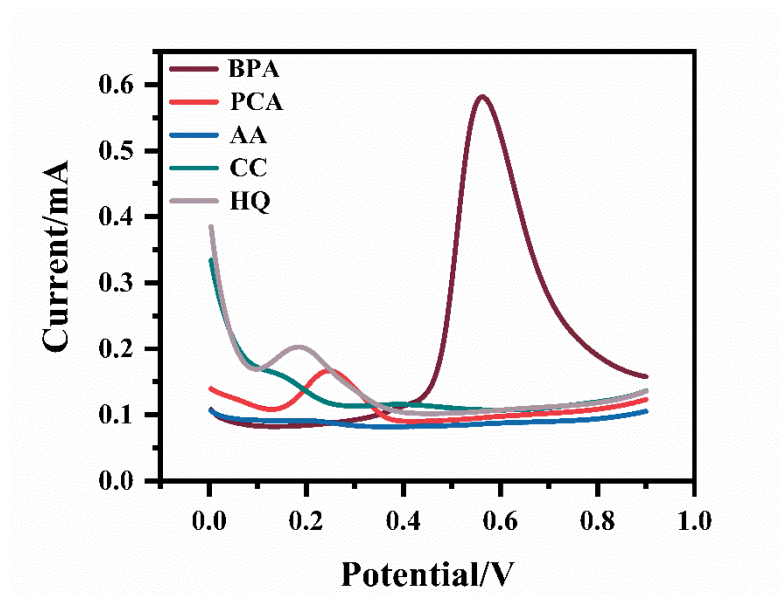

**Figure S2.** DPV responses of the MIP@CF electrode in pH 7.0 PBS solution after the recognition of 0.5  $\mu$ M of Bisphenol A or 5.0  $\mu$ M of protocatechuic acid (PCA), ascorbic acid (AA), catechol (CC), and hydroquinone (HQ).

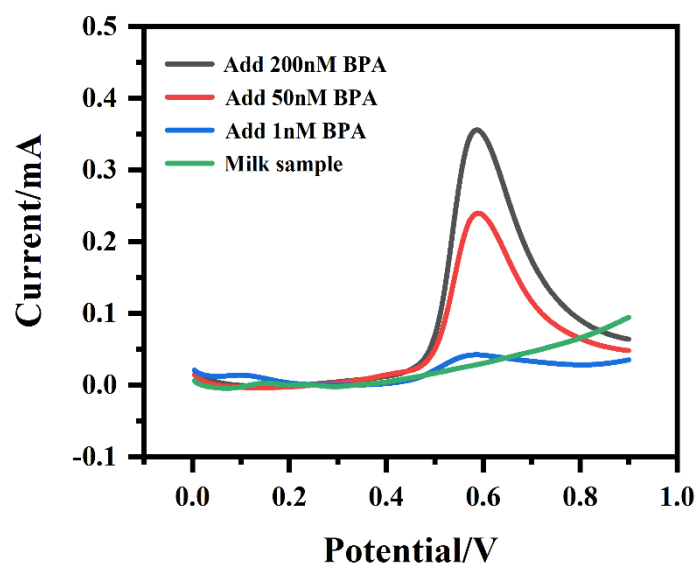

**Figure S3.** Electrochemical response of MIP@CF for milk sample analysis.
